# Supplementary material for: Worse Breast Cancer Prognosis of BRCA1/BRCA2 Mutation Carriers: What's the Evidence? A Systematic Review with Meta-Analysis
Source: PLOS journal article supplement (doi:10.1371/journal.pone.0120189), 2015-03-27
Supplement: S5 (10.1371/journal.pone.0120189.s005) [file journal.pone.0120189.s005]

## S5 Supporting Information. Results *BRCA2* mutation carriership.

Forest plots (the forest plots are also shown outside the Supporting information (Figs. 4A-D), but are repeated here for readability): size of the bullet represents the number of included carriers; black bullet = HQ study; round bullet (●) and \* = A. Jewish study population, only founder mutations tested; square bullet (■) and \*\* = specific study population (but not A. Jewish), in which only founder mutations were tested; — = 95% Confidence interval (only for hazard ratios); CGC based studies with ext. ref. = CGC based studies with external reference group; CGC based studies with int. ref. = CGC based studies with internal reference group; Sign = statistically significant ( $P < 0.05$ ); NS = not statistically significant; NR = not reported; †Adjusted for clinico-pathological characteristics and/or treatment.

### A. *BRCA2* mutation carriership and overall survival (OS)

#### Absolute OS differences: *BRCA2* mutation carriers compared to ‘non-carriers’

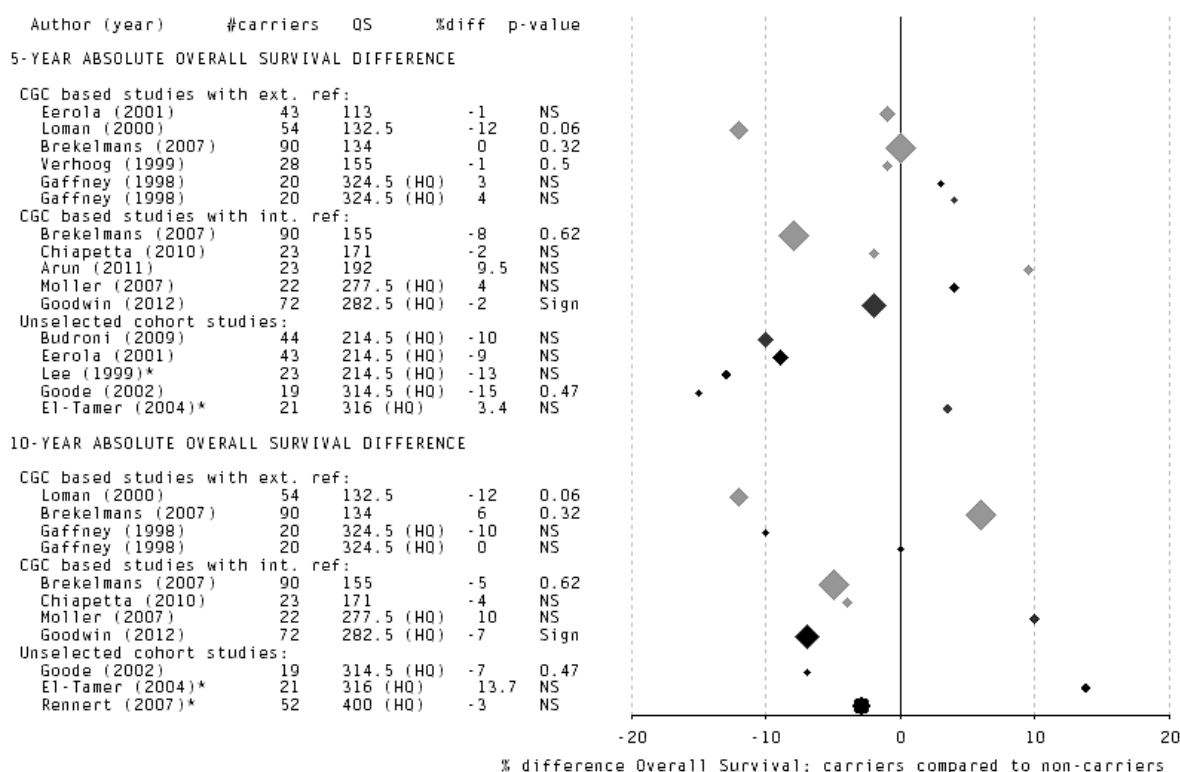

The forest plot above shows the absolute OS differences of *BRCA2* compared to ‘non-carriers’ reported by studies included in this review. Five studies [1-4] (31%) reported a better 5-year absolute OS for *BRCA2* compared to ‘non-carriers’, but four [1,2,4] of these studies reported survival differences smaller than 5%. On the other hand, ten studies [5-13] (63%) reported a worse 5-year absolute OS, with differences ranging from 1% to 15% including one [13] statistically significant difference of 2%. Three studies [2,3,12] (27%) reported a better 10-year absolute OS for *BRCA2* compared to ‘non-carriers’, with differences of 6% and 13.7%. Comparable to the 5-year results, more studies (seven [1,7,9,11-14] (64%)) reported again a worse OS, with 10-year absolute OS differences ranging from 3% to 12%; including the same study [13] reporting a statistically significant difference of 7%.

## Hazard ratios for OS: *BRCA2* mutation carriers compared to ‘non-carriers’

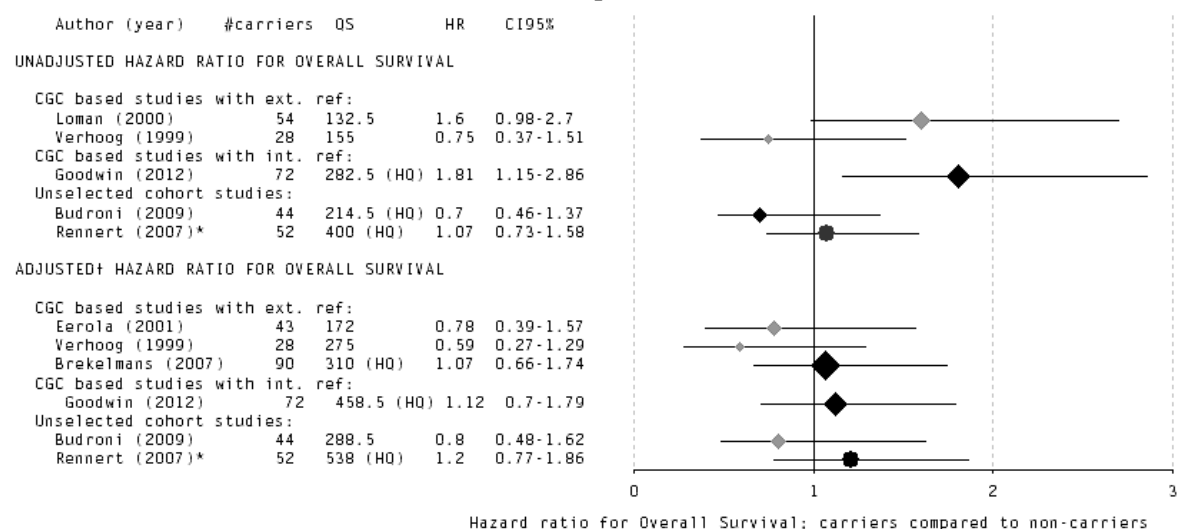

The forest plot above shows the seven studies [6-8,10,12-14] reporting adjusted and/or unadjusted HRs for OS for *BRCA2* compared to ‘non-carriers’. Three [7,13,14] (60%) of the five studies [6,7,10,13,14] reporting an unadjusted HR found a worse OS for *BRCA2* mutation carriers; one study [14] only observed a slight increased HR (1.07), however, another study [13] observed a HR which was statistically significant. The other two studies [6,10] (40%) reported a non-significant better unadjusted OS for *BRCA2* mutation carriers. For the adjusted OS for *BRCA2* compared to ‘non-carriers’, three studies [6,8] (50%) reported a better adjusted OS, while three other studies [12,14] (50%) reported a worse OS. None of these results were statistically significant.

## B. *BRCA2* mutation carriership and breast cancer-specific survival (BCSS)

### Absolute BCSS differences: *BRCA2* mutation carriers compared to ‘non-carriers’

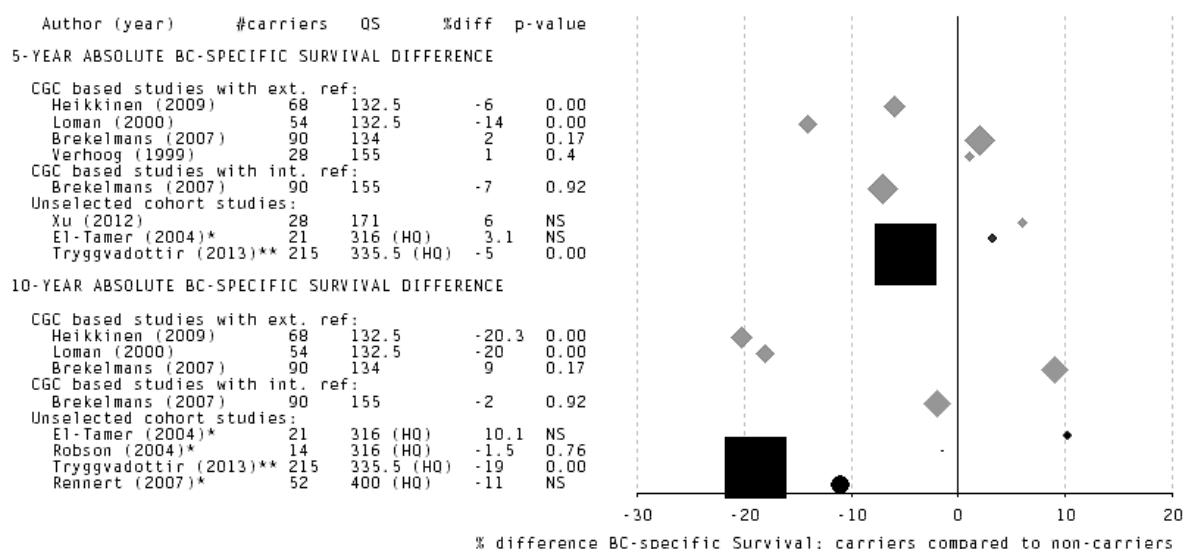

The forest plot above shows the absolute BCSS differences of *BRCA2* compared to ‘non-carriers’ reported by studies included in this review. Four studies [2,6,12,15] (50%) reported a better 5-year absolute BCSS for *BRCA2* compared to ‘non-carriers’, though all reported survival differences were less than 6%. The other four studies [7,12,16,17] (50%) reported a 5% to 14% worse 5-year BCSS for *BRCA2* mutation carriers, including three [7,16,17] statistically significant results. Only two studies [2,12] (25%) reported a better 10-year absolute BCSS for *BRCA2* compared to ‘non-carriers’ with absolute differences of 9% and 10.1%, while six studies [7,12,14,16-18] (75%) reported a worse 10-year BCSS for *BRCA2* mutation carriers, with differences ranging from 1.5% to 20.3 % including three [7,16,17] statistically significant results.

## Hazard ratios for BCSS: *BRCA2* mutation carriers compared to ‘non-carriers’

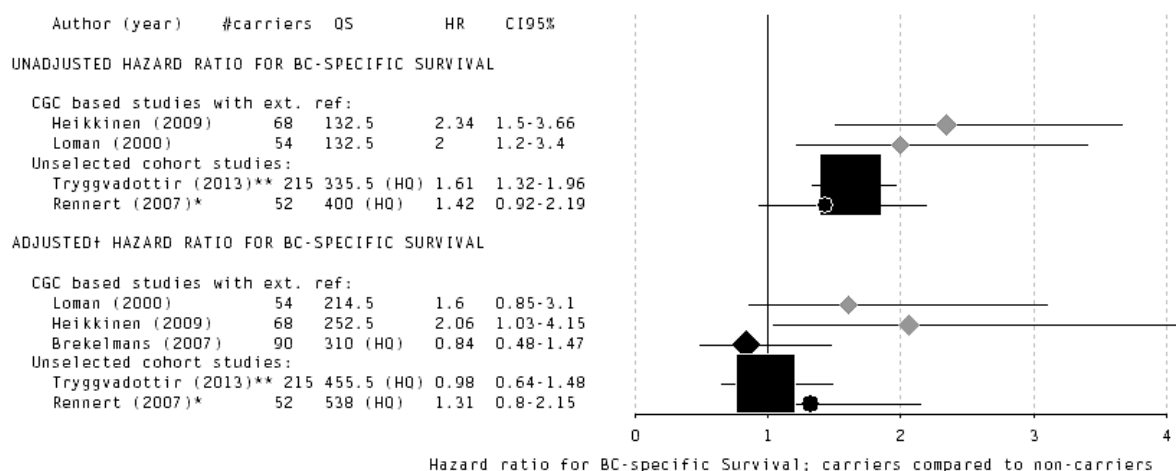

The forest plot above shows the univariate and multivariate hazard ratios for BCSS of *BRCA2* compared to ‘non-carriers’ reported by studies included in this review. For BCSS of *BRCA2* compared to ‘non-carriers’, only five studies [7,12,14,16,17] reported an HR; all four studies [7,14,16,17] reporting an unadjusted HR observed a worse BCSS for *BRCA2* mutation carriers, with HRs ranging from 1.42 to 2.34 and three [7,16,17] statistically significant results. On the other hand, three [7,14,17] (60%) of the five studies [7,12,14,16,17] reporting an adjusted HR found a worse adjusted BCSS for *BRCA2* compared to ‘non-carriers’; also only one [17] of these studies reported a statistically significant result. Two studies [12,16] (40%) reported a better adjusted BCSS for *BRCA2* mutation carriers (HR 0.98 and 0.84).

## C. *BRCA2* mutation carriership and metastasis-free survival (MFS)

There were only three studies [12,13] which reported the 5 and 10-year absolute MFS differences for *BRCA2* compared to ‘non-carriers’ (no figures shown). One substudy by Brekelmans and colleagues [12] did not find any difference, though the other substudy [12] reported a respectively 9% and 11% 5- and 10-year better absolute MFS for *BRCA2* mutation carriers. The HQ study by Goodwin and colleagues [13] reported a statistically significant 11% and 6% 5- and 10-year worse absolute MFS for *BRCA2* mutation carriers and also a statistically significant unadjusted HR of 1.63 (95% CI 1.02-2.6). In contrast, the adjusted HR which this study [13] reported was 1 (95% CI 0.62-1.61). The adjusted HR reported in the substudy of Brekelmans and colleagues [12] was 0.75 (95% CI 0.44-1.29).

## D. *BRCA2* mutation carriership and recurrence-free survival (RFS)

Five studies [2,4,6,12] (one HQ study [2]) reported 5-year absolute RFS differences for *BRCA2* compared to ‘non-carriers’ (no figure shown); three studies [2,12] (60%) observed a 5% to 9% worse absolute RFS for *BRCA2* mutation carriers. The substudies of Brekelmans and colleagues [12] also reported 10-year absolute RFS differences, i.e. 4% (better survival) and 2% (worse survival) for *BRCA2* compared to ‘non-carriers’. On the other hand, Arun and colleagues [4] observed a 19.4% better 5-year absolute RFS for *BRCA2* mutation carriers. Another study by Verhoog and colleagues [6] did not find any difference in 5-year absolute RFS between *BRCA2* and ‘non-carriers’, and additionally reported an unadjusted HR of 0.92 (95% CI 0.52-1.63). Adjustment of this HR made it stronger (HR 0.84, 95% CI 0.44-1.63). One substudy of Brekelmans and colleagues [12] also reported an adjusted better RFS for *BRCA2* mutation carriers (HR 0.85, 95% CI 0.26-2.77). None of the above results were significant.

## References

1. Gaffney DK, Brohet RM, Lewis CM, Holden JA, Buys SS, et al. Response to radiation therapy and prognosis in breast cancer patients with BRCA1 and BRCA2 mutations. *Radiother Oncol.* 1998;47: 129-136.
2. El Tamer M, Russo D, Troxel A, Bernardino LP, Mazziotta R, et al. Survival and recurrence after breast cancer in BRCA1/2 mutation carriers. *Ann Surg Oncol.* 2004;11: 157-164.
3. Moller P, Evans DG, Reis MM, Gregory H, Anderson E, et al. Surveillance for familial breast cancer: Differences in outcome according to BRCA mutation status. *Int J Cancer.* 2007;121: 1017-1020.
4. Arun B, Bayraktar S, Liu DD, Gutierrez Barrera AM, Atchley D, et al. Response to neoadjuvant systemic therapy for breast cancer in BRCA mutation carriers and noncarriers: a single-institution experience. *J Clin Oncol.* 2011;29: 3739-3746.
5. Lee JS, Wacholder S, Struwing JP, McAdams M, Pee D, et al. Survival after breast cancer in Ashkenazi Jewish BRCA1 and BRCA2 mutation carriers. *J Natl Cancer Inst.* 1999;91: 259-263.
6. Verhoog LC, Brekelmans CT, Seynaeve C, Dahmen G, van Geel AN, et al. Survival in hereditary breast cancer associated with germline mutations of BRCA2. *J Clin Oncol.* 1999;17: 3396-3402.
7. Loman N, Johannsson O, Bendahl P, Dahl N, Einbeigi Z, et al. Prognosis and clinical presentation of BRCA2-associated breast cancer. *Eur J Cancer.* 2000;36: 1365-1373.
8. Eerola H, Vahteristo P, Sarantausta L, Kyyronen P, Pyrhonen S, et al. Survival of breast cancer patients in BRCA1, BRCA2, and non-BRCA1/2 breast cancer families: a relative survival analysis from Finland. *Int J Cancer.* 2001;93: 368-372.
9. Goode EL, Dunning AM, Kuschel B, Healey CS, Day NE, et al. Effect of germ-line genetic variation on breast cancer survival in a population-based study. *Cancer Res.* 2002;62: 3052-3057.
10. Budroni M, Cesaraccio R, Coviello V, Sechi O, Pirino D, et al. Role of BRCA2 mutation status on overall survival among breast cancer patients from Sardinia. *BMC Cancer.* 2009;9: 62.
11. Chiappetta G, Ottaiano A, Vuttariello E, Monaco M, Galdiero F, et al. HMGA1 protein expression in familial breast carcinoma patients. *Eur J Cancer.* 2010;46: 332-339.
12. Brekelmans CT, Tilanus-Linthorst MM, Seynaeve C, vd Ouweland A, Menke-Pluymers MB, et al. Tumour characteristics, survival and prognostic factors of hereditary breast cancer from BRCA2-, BRCA1- and non-BRCA1/2 families as compared to sporadic breast cancer cases. *Eur J Cancer.* 2007;43: 867-876.
13. Goodwin PJ, Phillips KA, West DW, Ennis M, Hopper JL, et al. Breast cancer prognosis in BRCA1 and BRCA2 mutation carriers: an International Prospective Breast Cancer Family Registry population-based cohort study. *J Clin Oncol.* 2012;30: 19-26.
14. Rennert G, Bisland-Naggan S, Barnett-Griness O, Bar-Joseph N, Zhang S, et al. Clinical outcomes of breast cancer in carriers of BRCA1 and BRCA2 mutations. *N Engl J Med.* 2007;357: 115-123.
15. Xu J, Wang B, Zhang Y, Li R, Wang Y, et al. Clinical implications for BRCA gene mutation in breast cancer. *Mol Biol Rep.* 2012;39: 3097-3102.
16. Tryggvadottir L, Olafsdottir EJ, Olafsdottir GH, Sigurdsson H, Johannsson OT, et al. Tumour diploidy and survival in breast cancer patients with BRCA2 mutations. *Breast Cancer Res Treat.* 2013;140: 375-384.
17. Heikkinen T, Karkkainen H, Aaltonen K, Milne RL, Heikkila P, et al. The breast cancer susceptibility mutation PALB2 1592delT is associated with an aggressive tumor phenotype. *Clin Cancer Res.* 2009;15: 3214-3222.
18. Robson ME, Chappuis PO, Satagopan J, Wong N, Boyd J, et al. A combined analysis of outcome following breast cancer: differences in survival based on BRCA1/BRCA2 mutation status and administration of adjuvant treatment. *Breast Cancer Res.* 2004;6: R8-R17.
