# Supplementary material for: Worse Breast Cancer Prognosis of BRCA1/BRCA2 Mutation Carriers: What's the Evidence? A Systematic Review with Meta-Analysis
Source: PLOS journal article supplement (doi:10.1371/journal.pone.0120189), 2015-03-27
Supplement: S9 (10.1371/journal.pone.0120189.s009) [file journal.pone.0120189.s009]

**S9 Supporting Information. Summary of the sensitivity analysis of the best-evidence synthesis for *BRCA1* (panel A), *BRCA2* (panel B) and *BRCA1/2* (panel C) mutation carriership and breast cancer prognosis.**

Sensitivity analyses are performed by changing the cut-offs for an effect and using only the significant results (still only the HQ studies are used for the best evidence synthesis).

**A. Sensitivity analysis of the best-evidence synthesis: *BRCA1* mutation carriership**

|                  |                                      | Survival          | Evidence <sup>b</sup> based on HQ studies |                                        |                                        |             |
|------------------|--------------------------------------|-------------------|-------------------------------------------|----------------------------------------|----------------------------------------|-------------|
| Type of survival | Unadjusted/<br>adjusted <sup>a</sup> | Better:<br>Worse: | Original cut-offs:                        |                                        |                                        | p < 0.05    |
|                  |                                      |                   | >=5% / HR <=0.94<br>>=5% / HR >=1.07      | >=10% / HR <=0.88<br>>=10% / HR >=1.14 | >=15% / HR <=0.82<br>>=15% / HR >=1.22 |             |
| Overall          | Unadjusted                           |                   | Indecisive                                | Indecisive                             | Nil                                    | Nil         |
|                  | Adjusted                             |                   | Moderate                                  | Indecisive                             | Indecisive                             | Nil         |
| BC-specific      | Unadjusted                           |                   | Moderate                                  | Indecisive                             | Indecisive                             | Nil         |
|                  | Adjusted                             |                   | Indecisive                                | Indecisive                             | Nil                                    | Nil         |
| Metastasis-free  | Unadjusted                           |                   | Indecisive                                | Indecisive                             | Indecisive                             | Indecisive  |
|                  | Adjusted                             |                   | Indecisive                                | Indecisive                             | Indecisive                             | Nil         |
| Recurrence-free  | Unadjusted                           |                   | Moderate                                  | Moderate                               | Moderate                               | Nil         |
|                  | Adjusted                             |                   | Indecisive*                               | Indecisive*                            | Indecisive*                            | Indecisive* |

**B. Sensitivity analysis of the best-evidence synthesis: *BRCA2* mutation carriership**

|                  |                                      | Survival          | Evidence <sup>b</sup> based on HQ studies |                                        |                                        |             |
|------------------|--------------------------------------|-------------------|-------------------------------------------|----------------------------------------|----------------------------------------|-------------|
| Type of survival | Unadjusted/<br>adjusted <sup>a</sup> | Better:<br>Worse: | Original cut-offs:                        |                                        |                                        | p < 0.05    |
|                  |                                      |                   | >=5% / HR <=0.94<br>>=5% / HR >=1.07      | >=10% / HR <=0.88<br>>=10% / HR >=1.14 | >=15% / HR <=0.82<br>>=15% / HR >=1.22 |             |
| Overall          | Unadjusted                           |                   | Moderate                                  | Indecisive                             | Nil                                    | Nil         |
|                  | Adjusted                             |                   | Indecisive*                               | Indecisive*                            | Indecisive*                            | Indecisive* |
| BC-specific      | Unadjusted                           |                   | Indecisive                                | Indecisive                             | Moderate                               | Nil         |
|                  | Adjusted                             |                   | Indecisive*                               | Indecisive*                            | Indecisive*                            | Indecisive* |
| Metastasis-free  | Unadjusted                           |                   | Indecisive*                               | Indecisive*                            | Indecisive*                            | Indecisive* |
|                  | Adjusted                             |                   | Indecisive*                               | Indecisive*                            | Indecisive*                            | Indecisive* |
| Recurrence-free  | Unadjusted                           |                   | Indecisive*                               | Indecisive*                            | Indecisive*                            | Indecisive* |
|                  | Adjusted                             |                   | Indecisive*                               | Indecisive*                            | Indecisive*                            | Indecisive* |

**C. Sensitivity analysis of the best-evidence synthesis: *BRCA1/2* mutation carriership**

|                  |                                      | Survival          | Evidence <sup>b</sup> based on HQ studies |                                        |                                        |             |
|------------------|--------------------------------------|-------------------|-------------------------------------------|----------------------------------------|----------------------------------------|-------------|
| Type of survival | Unadjusted/<br>adjusted <sup>a</sup> | Better:<br>Worse: | Original cut-offs:                        |                                        |                                        | p < 0.05    |
|                  |                                      |                   | >=5% / HR <=0.94<br>>=5% / HR >=1.07      | >=10% / HR <=0.88<br>>=10% / HR >=1.14 | >=15% / HR <=0.82<br>>=15% / HR >=1.22 |             |
| Overall          | Unadjusted                           |                   | Nil                                       | Nil                                    | Nil                                    | Nil         |
|                  | Adjusted                             |                   | Indecisive*                               | Indecisive*                            | Indecisive*                            | Indecisive* |
| BC-specific      | Unadjusted                           |                   | Indecisive                                | Indecisive                             | Indecisive                             | Moderate    |
|                  | Adjusted                             |                   | Indecisive*                               | Indecisive*                            | Indecisive*                            | Indecisive* |
| Metastasis-free  | Unadjusted                           |                   | Indecisive                                | Indecisive                             | Indecisive                             | Indecisive  |
|                  | Adjusted                             |                   | Indecisive*                               | Indecisive*                            | Indecisive*                            | Indecisive* |
| Recurrence-free  | Unadjusted                           |                   | Indecisive                                | Indecisive                             | Nil                                    | Nil         |
|                  | Adjusted                             |                   | Indecisive*                               | Indecisive*                            | Indecisive*                            | Indecisive* |

<sup>a</sup>Adjusted survival is based on risk estimates adjusted for clinico-pathological characteristics and/or treatment;

<sup>b</sup>See S2 Supporting Information (Best-evidence synthesis). Strong evidence: more than 75% of the HQ studies reported a worse survival; moderate evidence: 60-75% of the HQ studies reported a worse survival and less than 25% of the HQ studies reported a better survival / 50-60% of the HQ studies reported a worse survival and less than 10% of the HQ studies reported a better survival; nil evidence: more than 60% of the HQ studies reported a better survival or no association / more than 40% of the HQ studies reported a better survival; indecisive evidence: all other options / less than four HQ studies available (\*).
