# Supplementary material for: Worse Breast Cancer Prognosis of BRCA1/BRCA2 Mutation Carriers: What's the Evidence? A Systematic Review with Meta-Analysis
Source: PLOS journal article supplement (doi:10.1371/journal.pone.0120189), 2015-03-27
Supplement: S10 (10.1371/journal.pone.0120189.s010) [file journal.pone.0120189.s010]

## S10 Supporting Information. Confounding and/or mediating factors.

### A. Differences in confounders and mediating factors between *BRCA1* and *BRCA2* mutation carriers compared to 'non-carriers' reported in studies included in this review.

| Factors* →                                                                                                      | Higher grade tumours |      | Higher stage tumours |      | LN+ tumours |      | Large size tumours |      | ER+ tumours |      | CT received |      | HT received |      |
|-----------------------------------------------------------------------------------------------------------------|----------------------|------|----------------------|------|-------------|------|--------------------|------|-------------|------|-------------|------|-------------|------|
|                                                                                                                 | N                    | %    | N                    | %    | N           | %    | N                  | %    | N           | %    | N           | %    | N           | %    |
| <b>BRCA1</b>                                                                                                    |                      |      |                      |      |             |      |                    |      |             |      |             |      |             |      |
| Studies describing differences of the factor* for <i>BRCA1</i> carriers compared to 'non-carriers' <sup>a</sup> | 19                   | 4.2  | 12                   | 26.7 | 22          | 48.9 | 19                 | 42.2 | 19          | 42.2 | 11          | 24.4 | 12          | 26.7 |
| Studies reporting a lower percentage of the factor* in <i>BRCA1</i> carriers compared to 'non-carriers'         | 0                    | 0    | 1                    | 8.3  | 6           | 27.3 | 2                  | 10.5 | 19          | 100  | 0           | 0    | 10          | 83.3 |
| Studies reporting an equal distribution of the factor* in <i>BRCA1</i> carriers compared to 'non-carriers'      | 3                    | 15.8 | 10                   | 83.3 | 12          | 54.5 | 13                 | 68.4 | 0           | 0    | 5           | 45.5 | 2           | 16.7 |
| Studies reporting a higher percentage of the factor* in <i>BRCA1</i> carriers compared to 'non-carriers'        | 16                   | 84.2 | 1                    | 8.3  | 4           | 18.1 | 4                  | 21.1 | 0           | 0    | 6           | 54.5 | 0           | 0    |
| <b>BRCA2</b>                                                                                                    |                      |      |                      |      |             |      |                    |      |             |      |             |      |             |      |
| Studies describing differences of the factor* for <i>BRCA2</i> carriers compared to 'non-carriers' <sup>b</sup> | 7                    | 29.2 | 8                    | 33.3 | 13          | 54.2 | 9                  | 37.5 | 12          | 50   | 4           | 16.7 | 5           | 20.8 |
| Studies reporting a lower percentage of the factor* in <i>BRCA2</i> carriers compared to 'non-carriers'         | 0                    | 0    | 0                    | 0    | 1           | 7.7  | 0                  | 0    | 1           | 8.3  | 0           | 0    | 1           | 20   |
| Studies reporting an equal distribution of the factor* in <i>BRCA2</i> carriers compared to 'non-carriers'      | 4                    | 57.1 | 4                    | 50   | 6           | 46.2 | 6                  | 66.7 | 8           | 66.7 | 3           | 75   | 4           | 80   |
| Studies reporting a higher percentage of the factor* in <i>BRCA2</i> carriers compared to 'non-carriers'        | 3                    | 42.9 | 4                    | 50   | 6           | 46.2 | 3                  | 33.3 | 3           | 25   | 1           | 25   | 0           | 0    |

<sup>a</sup>Selection of studies included in this review and reporting any risk estimate for survival (independent of the type) of *BRCA1* mutation carriers compared to 'non-carriers' (total  $n = 45$  [1-38]); <sup>b</sup>Selection of studies included in this review and reporting any risk estimate for survival (independent of the type) of *BRCA2* mutation carriers compared to 'non-carriers' (total  $n = 24$  [5,6,9,12,14,16,19,21,22,26,27,29,30,32,35,36,38-42]). LN+ tumours = tumours with spread to the lymph nodes at diagnosis; ER+ tumours = tumours which have expression of the estrogen receptor; CT received = chemotherapy received as adjuvant treatment; HT received = hormonal therapy received as adjuvant treatment.

The differences in tumour characteristics of *BRCA1* and *BRCA2* mutation carriers compared to 'non-carriers' are described in about half of the studies included in this review (depending on the type of tumour characteristic, table above). When reported, mostly differences in grade and/or stage (defined as stage and/or lymph node status and/or size of the tumour) and/or estrogen receptor status were determined. Most of the studies [5,7,8,11,13,16-18,24-26,32,35,36,38] reporting differences in grade of tumours in *BRCA1* mutation carriers compared to 'non-carriers' [5,7,8,11,13,16-18,23-26,28,32,34-36,38] observed that the percentage of high grade tumours was larger in *BRCA1* mutation carriers compared to 'non-carriers' (84.2% of the studies; table above). For *BRCA2* mutation carriers, of the studies reporting differences in grade of tumours in *BRCA2* mutation carriers compared to 'non-carriers' [5,6,9,12,14,16,19,21,22,26,27,29,30,32,35,36,38-42], most [5,6,9,12,14,16,19,21,22,27,29,30,40-42] observed an equal distribution of high grade tumours in *BRCA2* mutation carriers and 'non-carriers' (57.1% of the studies), although none of the studies reported a lower percentage (table above). In contrast, most studies [4,14,25,27,34-38] reporting differences in stage of tumours observed an equal distribution of high stage tumours in *BRCA1* mutation carriers compared to 'non-carriers'. For *BRCA2* mutation carriers half [14,16,41] of the studies reported a higher percentage of high stage tumours in *BRCA2* mutation carriers compared to 'non-carriers', while none of the studies reported a lower percentage (table above). All studies reporting differences in estrogen receptor status of tumours in *BRCA1* mutation carriers compared to 'non-carriers' [3-5,7,13,17,18,21,22,24-27,32,35-38] observed a higher percentage of estrogen receptor negative tumours in *BRCA1* mutation carriers compared to 'non-carriers'. This was not observed for *BRCA2* mutation carriers (table above) [21,22,26,27,32,35,36,38-40,42].

A small part of the studies included in this review also reported differences in therapy given for breast cancer in *BRCA1* and *BRCA2* mutation carriers compared to 'non-carriers' (table above). About half of the studies [3,21,22,25,43] observed that a higher percentage of *BRCA1* mutation carriers received chemotherapy compared to non-carriers (none of the studies reported that a lower percentage of *BRCA1* mutation carriers received chemotherapy). Furthermore, most of the studies [3,18,21,24,25,32,34,36,38] (83.3%) reported that a lower percentage of hormone therapy was given to *BRCA1* mutation carriers compared to 'non-carriers'. Such differences were not seen when looking at studies reporting differences in treatment given to *BRCA2* mutation carriers compared to 'non-carriers' (table above) [21,22,32,36,38].

## B. Effect of adjustment for tumour characteristics and/or treatment on Hazard ratios.

To examine the effect of adjustment for confounders on the prognosis of *BRCA1* and *BRCA2* mutation carriers, we compared pairs of unadjusted HR (HR<sub>unadjusted</sub>) and adjusted HR (HR<sub>adjusted</sub>). Because of the low numbers of HR pairs per outcome and the large differences in confounders/mediating variables adjusted for, we could not stratify for these factors in the analysis.

Twenty-three unadjusted plus adjusted HR pairs have been reported for the relation between *BRCA1* carriership and survival [3,4,13,16,18,24,25,27,32,34,38]. In 13 HR pairs [3,4,13,16,18,24,27,32,38] a worse unadjusted survival for *BRCA1* mutation carriers compared to 'non-carriers' was reported (HR<sub>unadjusted</sub>>1); after adjustment for confounders/mediating variables, in nine pairs [13,16,18,24,27,38] (75%) the HR became weaker (but still in the same direction) or changed to the direction of a better prognosis (HR<sub>adjusted</sub><1). For the other four HR pairs [3,4,27,32] (31%), the adjusted estimates were equal (difference HRs<0.1) (n=1 [27]) or became stronger (n=3 [3,4,32]). Furthermore, there were nine HR pairs [25,32,34] with a better unadjusted survival for *BRCA1* mutation carriers compared to 'non-carriers' (HR<sub>unadjusted</sub><1). In the majority of these pairs the effect was still in the same direction after adjustment; stronger in three pairs [25] (33%), equal (difference HRs<0.1) in two pairs [32,34] (22%) and weaker in two pairs [34] (22%). In two pairs [32] (22%) the effect changed to a worse prognosis (HR<sub>adjusted</sub>>1) (Table 4).

Ten unadjusted plus adjusted HR pairs have been reported for the relation between *BRCA2* carriership and survival [27,29,38-42]. In seven HR pairs [27,29,38,39,41] a worse unadjusted survival for *BRCA2* mutation carriers compared to 'non-carriers' was observed (HR<sub>unadjusted</sub>>1); six of these [27,29,38,39,41] (86%) reported a weaker effect in the same direction or even to the direction of a better prognosis after adjustment. Only in one [27] (14%) of these HR pairs the adjusted estimate was stronger. For the three other HR pairs [40,42] with a better unadjusted survival for *BRCA2* mutation carriers (HR<sub>unadjusted</sub><1), one [40] showed a stronger effect after adjustment; in the two others [40,42] the effect was equal (difference HRs<0.1) (Table 4).

## References

1. Johannsson OT, Ranstam J, Borg A, Olsson H. Survival of BRCA1 breast and ovarian cancer patients: a population-based study from southern Sweden. *J Clin Oncol*. 1998;16: 397-404.
2. Plakhins G, Irmejs A, Gardovskis A, Subatniece S, Liepniece-Karele I, et al. Underestimated survival predictions of the prognostic tools Adjuvant! Online and PREDICT in BRCA1-associated breast cancer patients. *Fam Cancer*. 2013.
3. Huzarski T, Byrski T, Gronwald J, Gorski B, Domagala P, et al. Ten-Year Survival in Patients With BRCA1-Negative and BRCA1-Positive Breast Cancer. *J Clin Oncol*. 2013.
4. Verhoog LC, Brekelmans CT, Seynaeve C, van den Bosch LM, Dahmen G, et al. Survival and tumour characteristics of breast-cancer patients with germline mutations of BRCA1. *Lancet*. 1998;351: 316-321.
5. Wagner TM, Moslinger RA, Muhr D, Langbauer G, Hirtenlehner K, et al. BRCA1-related breast cancer in Austrian breast and ovarian cancer families: specific BRCA1 mutations and pathological characteristics. *Int J Cancer*. 1998;77: 354-360.
6. Gaffney DK, Brohet RM, Lewis CM, Holden JA, Buys SS, et al. Response to radiation therapy and prognosis in breast cancer patients with BRCA1 and BRCA2 mutations. *Radiother Oncol*. 1998;47: 129-136.
7. Ansquer Y, Gautier C, Fourquet A, Asselain B, Stoppa-Lyonnet D. Survival in early-onset BRCA1 breast-cancer patients. Institut Curie Breast Cancer Group. *Lancet*. 1998;352: 541.
8. Foulkes WD, Wong N, Brunet JS, Begin LR, Zhang JC, et al. Germ-line BRCA1 mutation is an adverse prognostic factor in Ashkenazi Jewish women with breast cancer. *Clin Cancer Res*. 1997;3: 2465-2469.
9. Lee JS, Wacholder S, Struwing JP, McAdams M, Pee D, et al. Survival after breast cancer in Ashkenazi Jewish BRCA1 and BRCA2 mutation carriers. *J Natl Cancer Inst*. 1999;91: 259-263.
10. Robson M, Levin D, Federici M, Satagopan J, Bogolminy F, et al. Breast conservation therapy for invasive breast cancer in Ashkenazi women with BRCA gene founder mutations. *J Natl Cancer Inst*. 1999;91: 2112-2117.
11. Hamann U, Sinn HP. Survival and tumor characteristics of German hereditary breast cancer patients. *Breast Cancer Res Treat*. 2000;59: 185-192.
12. Chappuis PO, Kapusta L, Begin LR, Wong N, Brunet JS, et al. Germline BRCA1/2 mutations and p27(Kip1) protein levels independently predict outcome after breast cancer. *J Clin Oncol*. 2000;18: 4045-4052.
13. Stoppa-Lyonnet D, Ansquer Y, Dreyfus H, Gautier C, Gauthier-Villars M, et al. Familial invasive breast cancers: worse outcome related to BRCA1 mutations. *J Clin Oncol*. 2000;18: 4053-4059.
14. Eerola H, Vahteristo P, Sarantausta L, Kyyronen P, Pyrhonen S, et al. Survival of breast cancer patients in BRCA1, BRCA2, and non-BRCA1/2 breast cancer families: a relative survival analysis from Finland. *Int J Cancer*. 2001;93: 368-372.
15. Einbeigi Z, Bergman A, Kindblom LG, Martinsson T, Meis-Kindblom JM, et al. A founder mutation of the BRCA1 gene in Western Sweden associated with a high incidence of breast and ovarian cancer. *Eur J Cancer*. 2001;37: 1904-1909.
16. Goode EL, Dunning AM, Kuschel B, Healey CS, Day NE, et al. Effect of germ-line genetic variation on breast cancer survival in a population-based study. *Cancer Res*. 2002;62: 3052-3057.
17. Moller P, Borg A, Evans DG, Haites N, Reis MM, et al. Survival in prospectively ascertained familial breast cancer: analysis of a series stratified by tumour characteristics, BRCA mutations and oophorectomy. *Int J Cancer*. 2002;101: 555-559.
18. Goffin JR, Chappuis PO, Begin LR, Wong N, Brunet JS, et al. Impact of germline BRCA1 mutations and overexpression of p53 on prognosis and response to treatment following breast carcinoma: 10-year follow up data. *Cancer*. 2003;97: 527-536.
19. Goffin JR, Straume O, Chappuis PO, Brunet JS, Begin LR, et al. Glomeruloid microvascular proliferation is associated with p53 expression, germline BRCA1 mutations and an adverse outcome following breast cancer. *Br J Cancer*. 2003;89: 1031-1034.
20. Eccles D, Simmonds P, Goddard J, Coultas M, Hodgson S, et al. Familial breast cancer: an investigation into the outcome of treatment for early stage disease. *Fam Cancer*. 2001;1: 65-72.
21. Robson ME, Chappuis PO, Satagopan J, Wong N, Boyd J, et al. A combined analysis of outcome following breast cancer: differences in survival based on BRCA1/BRCA2 mutation status and administration of adjuvant treatment. *Breast Cancer Res*. 2004;6: R8-R17.
22. El Tamer M, Russo D, Troxel A, Bernardino LP, Mazziotta R, et al. Survival and recurrence after breast cancer in BRCA1/2 mutation carriers. *Ann Surg Oncol*. 2004;11: 157-164.
23. Seynaeve C, Verhoog LC, van de Bosch LM, van Geel AN, Menke-Pluymers M, et al. Ipsilateral breast tumour recurrence in hereditary breast cancer following breast-conserving therapy. *Eur J Cancer*. 2004;40: 1150-1158.
24. Chappuis PO, Donato E, Goffin JR, Wong N, Begin LR, et al. Cyclin E expression in breast cancer: predicting germline BRCA1 mutations, prognosis and response to treatment. *Ann Oncol*. 2005;16: 735-742.

25. Bonadona V, Dussart-Moser S, Voirin N, Sinilnikova OM, Mignotte H, et al. Prognosis of early-onset breast cancer based on BRCA1/2 mutation status in a French population-based cohort and review. *Breast Cancer Res Treat.* 2007;101: 233-245.
26. Moller P, Evans DG, Reis MM, Gregory H, Anderson E, et al. Surveillance for familial breast cancer: Differences in outcome according to BRCA mutation status. *Int J Cancer.* 2007;121: 1017-1020.
27. Rennert G, Bisland-Naggan S, Barnett-Griness O, Bar-Joseph N, Zhang S, et al. Clinical outcomes of breast cancer in carriers of BRCA1 and BRCA2 mutations. *N Engl J Med.* 2007;357: 115-123.
28. Vinodkumar B, Syamala V, Abraham EK, Balakrishnan R, Ankathil R. Germline BRCA1 mutation and survival analysis in familial breast cancer patients in Kerala; South India. *J Exp Clin Cancer Res.* 2007;26: 329-336.
29. Heikkinen T, Karkkainen H, Aaltonen K, Milne RL, Heikkila P, et al. The breast cancer susceptibility mutation PALB2 1592delT is associated with an aggressive tumor phenotype. *Clin Cancer Res.* 2009;15: 3214-3222.
30. Chiappetta G, Ottaiano A, Vuttariello E, Monaco M, Galdiero F, et al. HMGA1 protein expression in familial breast carcinoma patients. *Eur J Cancer.* 2010;46: 332-339.
31. Cortesi L, Masini C, Cirilli C, Medici V, Marchi I, et al. Favourable ten-year overall survival in a Caucasian population with high probability of hereditary breast cancer. *BMC Cancer.* 2010;10: 90.
32. Brekelmans CT, Tilanus-Linthorst MM, Seynaeve C, vd Ouweland A, Menke-Pluymers MB, et al. Tumour characteristics, survival and prognostic factors of hereditary breast cancer from BRCA2-, BRCA1- and non-BRCA1/2 families as compared to sporadic breast cancer cases. *Eur J Cancer.* 2007;43: 867-876.
33. Hagen AI, Tretli S, Maehle L, Apold J, Veda N, et al. Survival in Norwegian BRCA1 mutation carriers with breast cancer. *Hered Cancer Clin Pract.* 2009;7: 7.
34. Lee LJ, Alexander B, Schnitt SJ, Comander A, Gallagher B, et al. Clinical outcome of triple negative breast cancer in BRCA1 mutation carriers and noncarriers. *Cancer.* 2011;117: 3093-3100.
35. Xu J, Wang B, Zhang Y, Li R, Wang Y, et al. Clinical implications for BRCA gene mutation in breast cancer. *Mol Biol Rep.* 2012;39: 3097-3102.
36. Arun B, Bayraktar S, Liu DD, Gutierrez Barrera AM, Atchley D, et al. Response to neoadjuvant systemic therapy for breast cancer in BRCA mutation carriers and noncarriers: a single-institution experience. *J Clin Oncol.* 2011;29: 3739-3746.
37. Plakhins G, Irmejs A, Gardovskis A, Subatniece S, Rozite S, et al. Genotype-phenotype correlations among BRCA1 4153delA and 5382insC mutation carriers from Latvia. *BMC Med Genet.* 2011;12: 147.
38. Goodwin PJ, Phillips KA, West DW, Ennis M, Hopper JL, et al. Breast cancer prognosis in BRCA1 and BRCA2 mutation carriers: an International Prospective Breast Cancer Family Registry population-based cohort study. *J Clin Oncol.* 2012;30: 19-26.
39. Tryggvadottir L, Olafsdottir EJ, Olafsdottir GH, Sigurdsson H, Johannsson OT, et al. Tumour diploidy and survival in breast cancer patients with BRCA2 mutations. *Breast Cancer Res Treat.* 2013;140: 375-384.
40. Verhoog LC, Brekelmans CT, Seynaeve C, Dahmen G, van Geel AN, et al. Survival in hereditary breast cancer associated with germline mutations of BRCA2. *J Clin Oncol.* 1999;17: 3396-3402.
41. Loman N, Johannsson O, Bendahl P, Dahl N, Einbeigi Z, et al. Prognosis and clinical presentation of BRCA2-associated breast cancer. *Eur J Cancer.* 2000;36: 1365-1373.
42. Budroni M, Cesaraccio R, Coviello V, Sechi O, Pirino D, et al. Role of BRCA2 mutation status on overall survival among breast cancer patients from Sardinia. *BMC Cancer.* 2009;9: 62.
43. Soumittra N, Meenakumari B, Parija T, Sridevi V, Nancy KN, et al. Molecular genetics analysis of hereditary breast and ovarian cancer patients in India. *Hered Cancer Clin Pract.* 2009;7: 13.
